# Supplementary material
Source: Springer Nature journal article supplement (https://www.springermedizin.de/resource/supplementary/12943_2008_378_MOESM1_ESM.pdf/9554054)

Transducing vector  
pTYF-EZ-siRNA

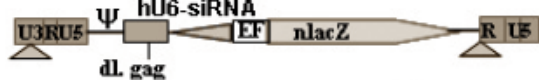

Helper construct  
pNHP

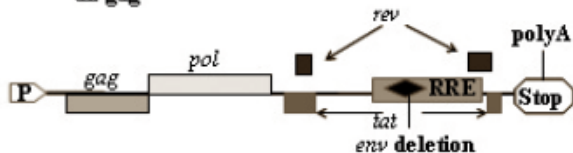

Envelope  
pHEF-VSVG

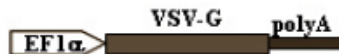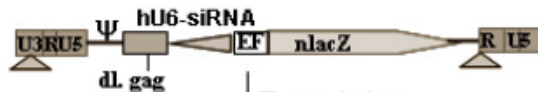

Viral genomic RNA

Host genomic DNA

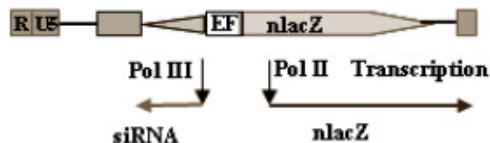

Supplement: MOESM1 [file 9554054]
